# Supplementary material
Source: Springer Nature journal article supplement (https://www.springermedizin.de/resource/supplementary/12901_2009_54_MOESM2_ESM.pdf/9515450)

Progressive Wavelet Level: Full

Se:4  
Im:21

[H]

Study Date:13/03/2008

Study Time:4:37:19 PM

MRN:

[A]

[P]

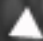

[F]

C366

W732

Supplement: MOESM2 [file 9515450]
